# Supplementary material for: Agricultural-Grade Apple Cider Vinegar Is Remarkably Attractive to Drosophila suzukii (Diptera: Drosophiliadae) in Mexico
Source: MDPI journal article supplement (doi:10.3390/insects11070448), 2020-07-15
Supplement: s1 [file s1]

**Table S1.** Characteristics of different brands of vinegars used in the study

| Vinegar type     | Brand                  | Acidity   | Label composition                                                                                       | Stabilizer/Preservative |
|------------------|------------------------|-----------|---------------------------------------------------------------------------------------------------------|-------------------------|
| ACV              | La Costeña             | 5%        | Apple cider vinegar diluted in water to 5% acidity with caramel color                                   | Sodium metabisulfite    |
| ACV              | Clemente Jacques       | 5%        | Apple cider vinegar plus sugarcane vinegar diluted in water to 5% acidity                               | Sodium metabisulfite    |
| Rice vinegar     | Sugoi                  | undefined | Acetic acid, sugar, salt, water and monosodium glutamate                                                | Sodium metabisulfite    |
| Red wine vinegar | Carbonell              | 6%        | Red wine vinegar                                                                                        | Sulfur dioxide          |
| ACV              | Clemente Jacques       | 5%        | Apple cider vinegar diluted with water, sugarcane vinegar with synthetic apple flavor and caramel color | Sodium metabisulfite    |
| ACV              | Heinz                  | 5%        | Ultra-filtered organic apple cider vinegar diluted to 5% acidity.                                       | undefined               |
| ACV              | Barrilito              | 5%        | Apple cider vinegar diluted in water to 5% acidity                                                      | undefined               |
| ACV              | Ruiz                   | undefined | Undefined                                                                                               | undefined               |
| ACV              | Picolargo edible grade | 5%        | Meets regulations NMX-F-122-1968, CODEX-STAN-162-1987 for human consumption                             | undefined               |
| ACV              | Picolargo agricultural | 5%        | For use as an organic herbicide and for cleaning agricultural irrigation equipment                      | none                    |
| AFV              | La Faburrita           | 5%        | Unspecified vinegar, water, apple concentrate and caramel color                                         | Sodium benzoate         |
| AFV              | San Miguel             | 5%        | Unspecified vinegar diluted to 5% acidity with natural colorant                                         | undefined               |
| AFV              | La Anita               | undefined | Acetic acid, water, synthetic apple flavor and a mixture of red, blue, yellow and tartrazine colorants  | undefined               |

ACV = apple cider vinegar

AFV = apple flavored vinegar
